# Supplementary material for: Grafting redox-active molecules on graphene oxide through a diamine linker: length optimization for electron transfer
Source: Royal Society of Chemistry journal article supplement (doi:10.1039/d1dt03197j), 2021-12-15
Supplement: d1dt03197j1.pdf [file d1dt03197j1.pdf]

## Supporting information

### Grafting redox-active molecule on graphene oxide through a diamine linker: length optimization for electron transfer

Rizwan Khan <sup>a,b</sup> and Yuta Nishina <sup>a,b\*</sup>

a Graduate school of natural science and technology, Okayama University, 3-1-1 Tsushimanaka, Kita-ku, Okayama 700-8530, Japan

b Research Core for Interdisciplinary Sciences, Okayama University, 3-1-1 Tsushimanaka, Kita-ku, Okayama 700-8530, Japan

E-mail: [nisina-y@cc.okayama-u.ac.jp](mailto:nisina-y@cc.okayama-u.ac.jp).

**Table S1.** Detail quantitative analysis of wide scan XPS spectra of **GO 1a**, and **GO 2a**.

| Sample       | at. % |      |            |
|--------------|-------|------|------------|
|              | C     | O    | N          |
| <b>GO 1a</b> | 70.0  | 25.8 | <b>3.6</b> |
| <b>GO 2a</b> | 80.0  | 17.1 | <b>2.9</b> |

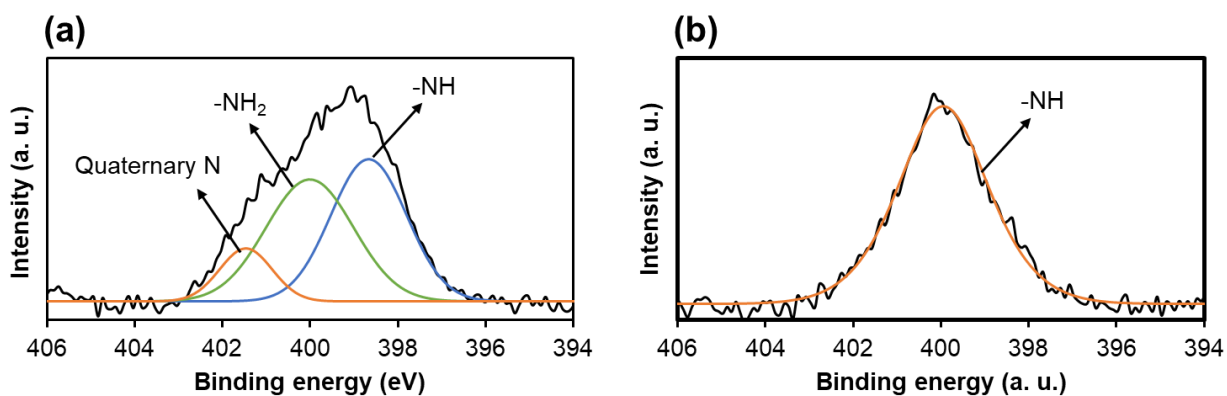

**Fig. S1.** High-resolution N 1s XPS spectra of (a) **GO 1a**, and (b) **GO 2a**

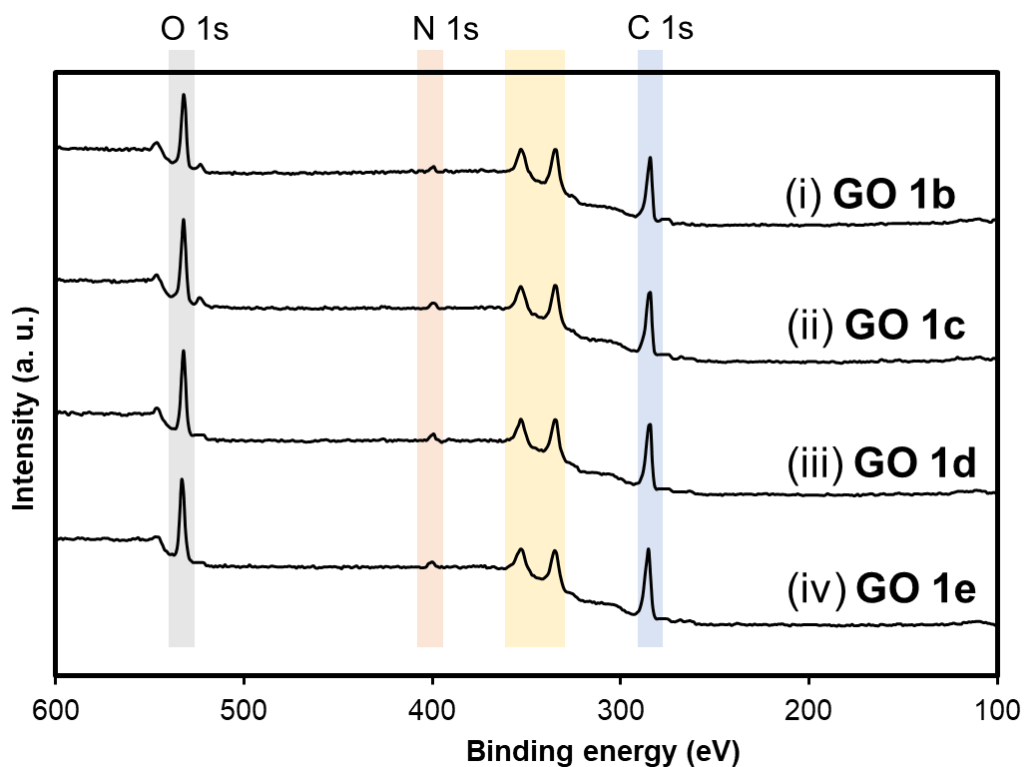

**Fig. S2.** XPS survey spectra of (i) **GO 1b**, (ii) **GO 1c**, (iii) **GO 1d**, and (iv) **GO 1e**.

**Table S2.** Detail quantitative analysis of wide scan XPS spectra of **GO 1b**, **GO 1c**, **GO 1d**, and **GO 1e**.

| Sample       | Element at. % |      |     |
|--------------|---------------|------|-----|
|              | C             | O    | N   |
| <b>GO 1b</b> | 71.7          | 25.5 | 2.7 |
| <b>GO 1c</b> | 71.7          | 25.2 | 2.9 |
| <b>GO 1d</b> | 71.3          | 25.1 | 3.5 |
| <b>GO 1e</b> | 71.9          | 24.6 | 3.3 |

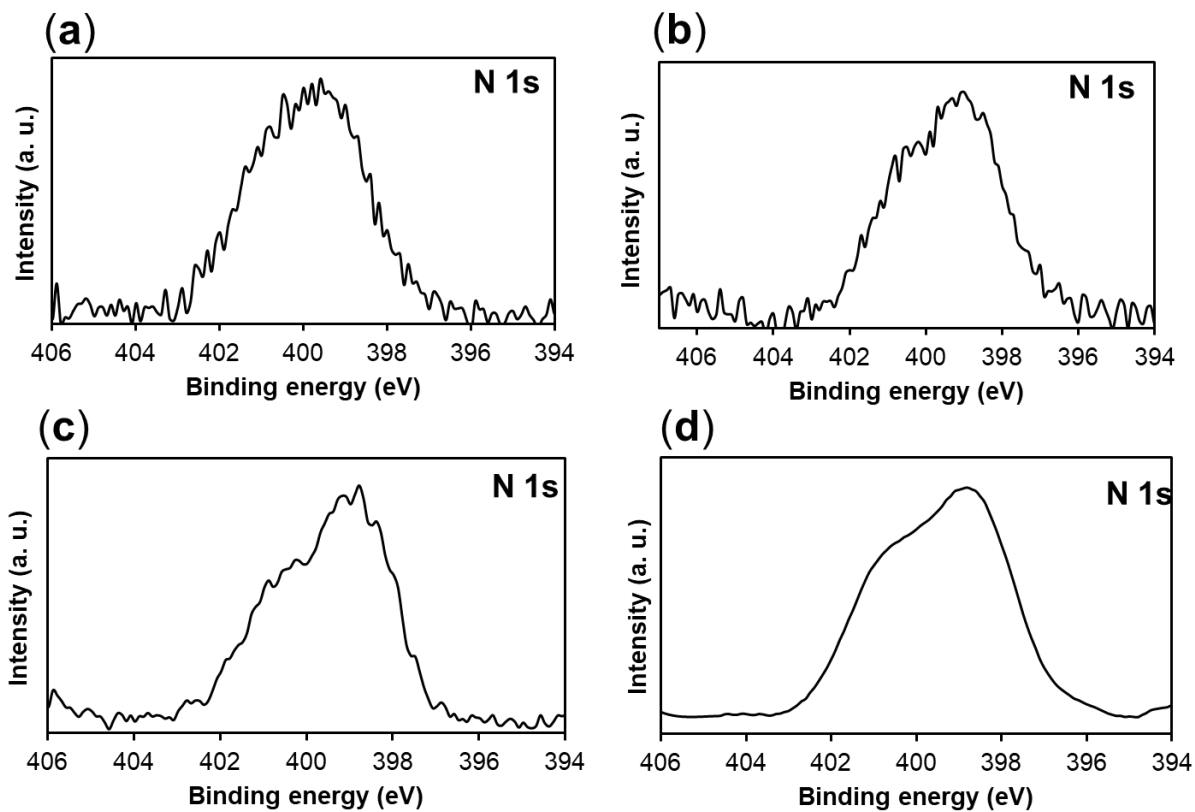

**Fig. S3.** High-resolution N 1s XPS spectra of (a) **GO 1b**, (b) **GO 1c**, (c) **GO 1d**, and (d) **GO 1e**.

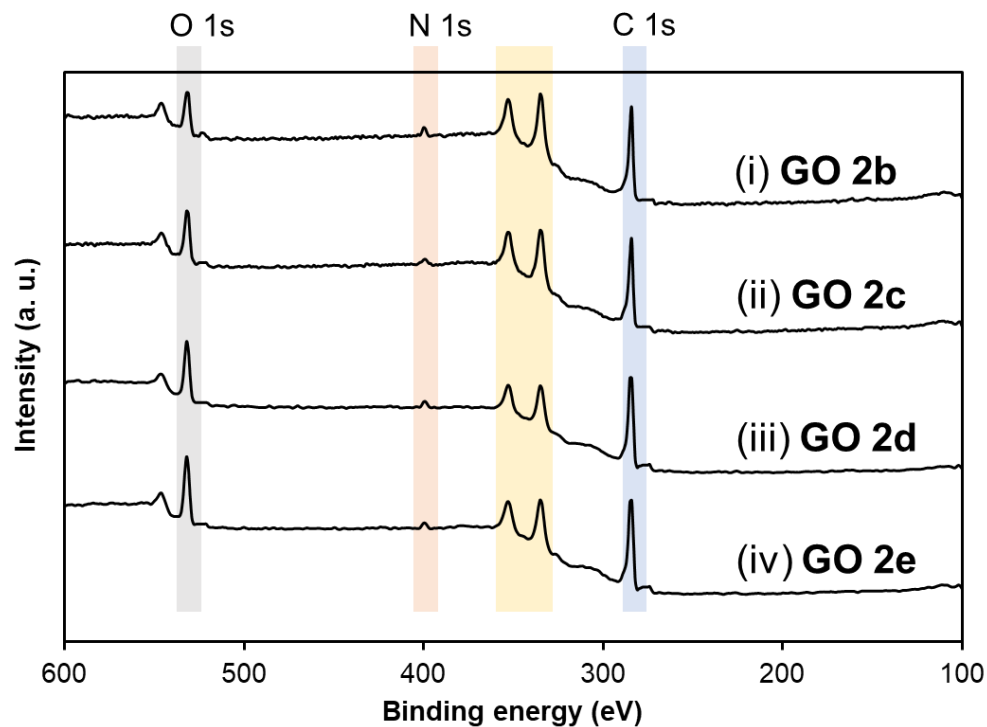

**Fig. S4.** XPS survey spectra of (i) **GO 2b**, (ii) **GO 2c**, (iii) **GO 2d**, and (iv) **GO 2e**.

**Table S3.** Detail quantitative analysis of wide scan XPS spectra of **GO 2b**, **GO 2c**, **GO 2d**, and **GO 2e**.

| Sample       | Element at. % |      |     |
|--------------|---------------|------|-----|
|              | C             | O    | N   |
| <b>GO 2b</b> | 81.3          | 16.1 | 2.5 |
| <b>GO 2c</b> | 79.7          | 17.1 | 2.8 |
| <b>GO 2d</b> | 79.1          | 18.1 | 2.8 |
| <b>GO 2e</b> | 78.1          | 19.3 | 2.5 |

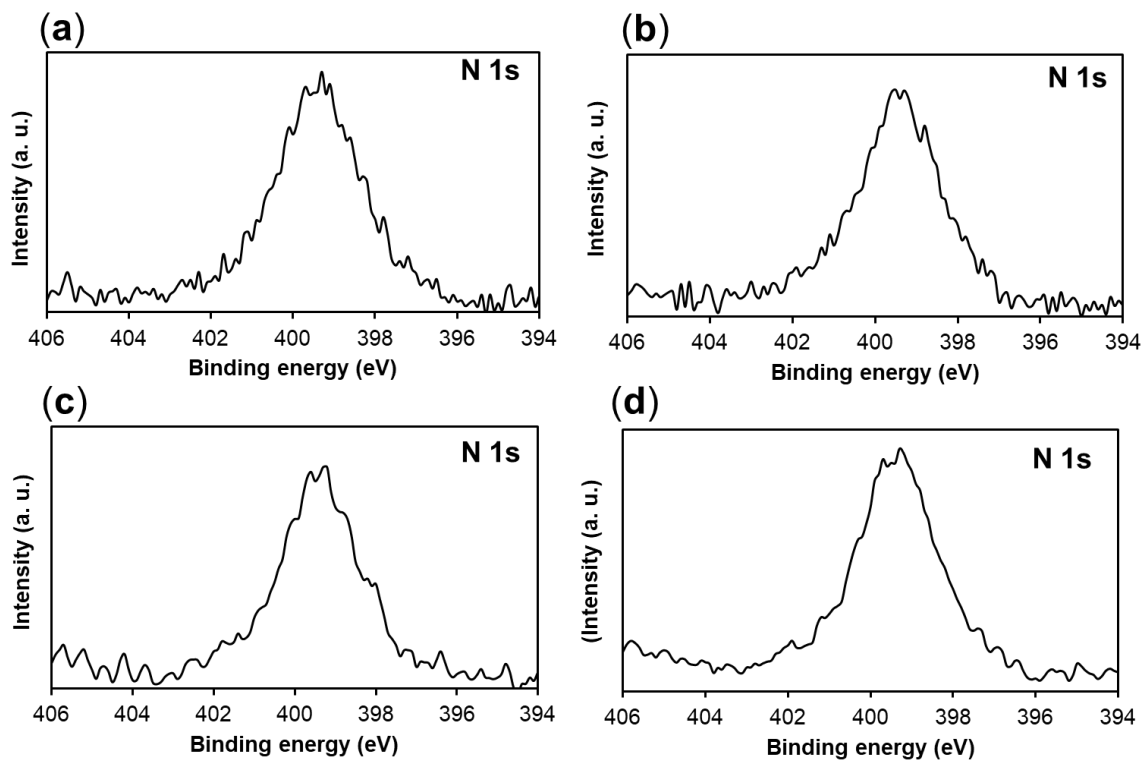

**Fig. S5.** High-resolution N 1s XPS spectra of (a) **GO 2b**, (b) **GO 2c**, (c) **GO 2d**, and (d) **GO 2e**.

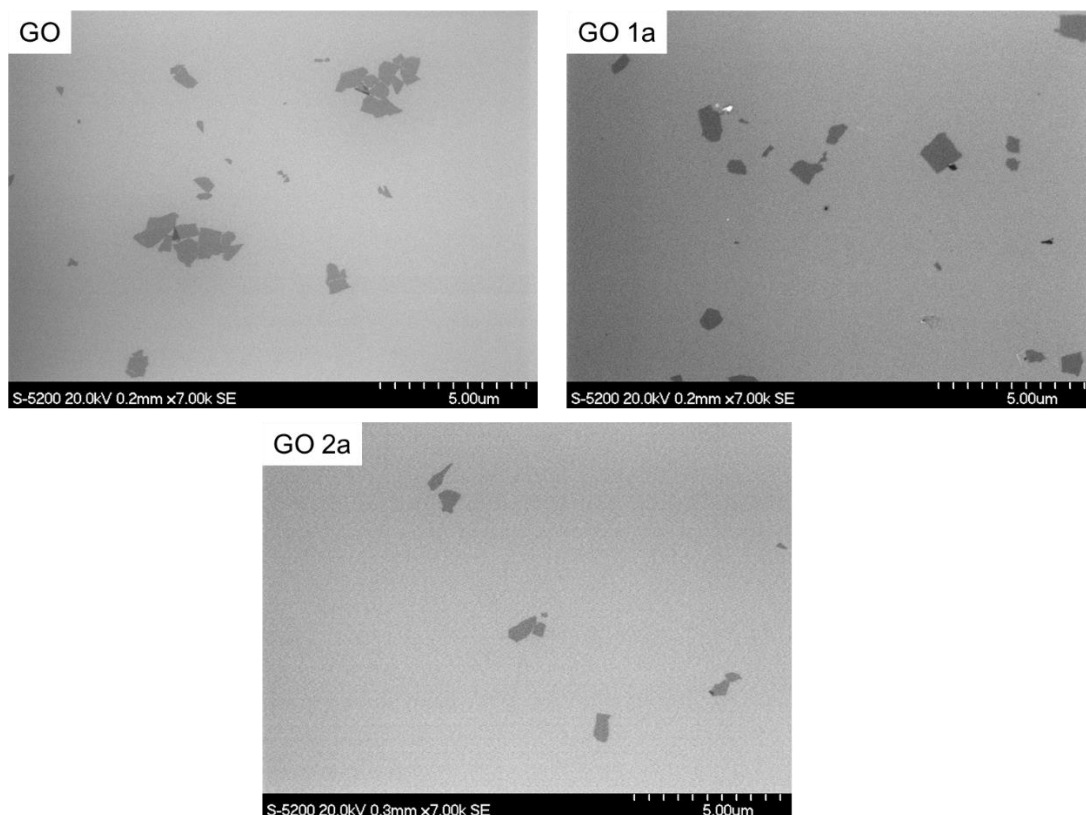

**Fig. S6.** SEM images of (a) GO, (b) GO 1a, and GO 2a

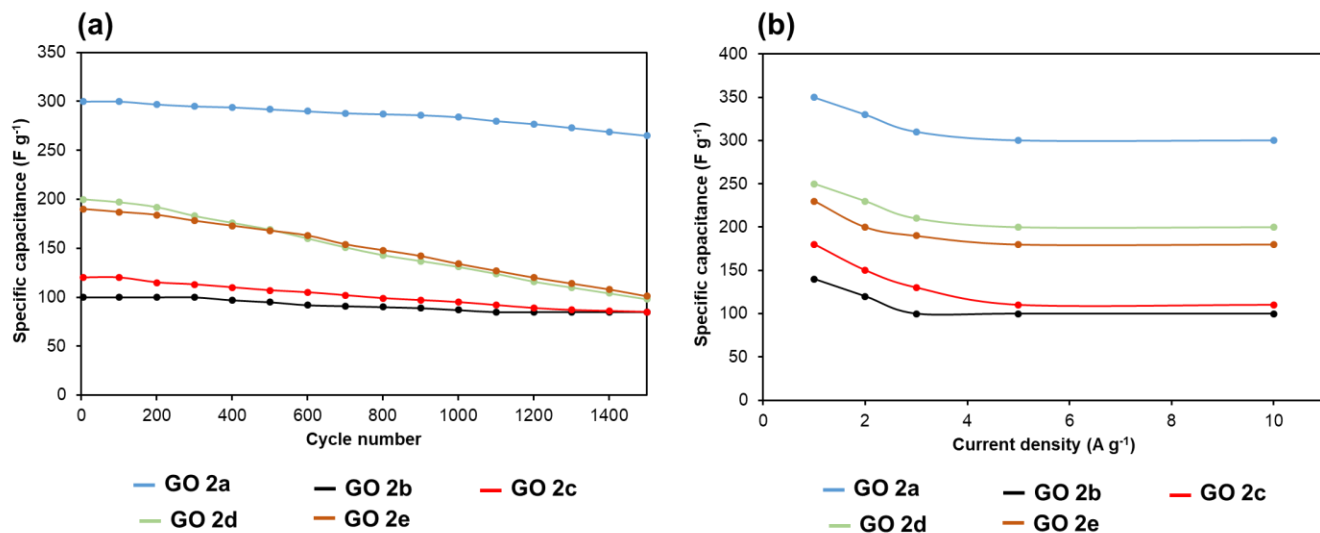

**Fig. S7.** (a) Cycling stability test of GO 2a-e at a current density of 10 A g<sup>-1</sup>; (b) rate capability test of GO 2a-e.

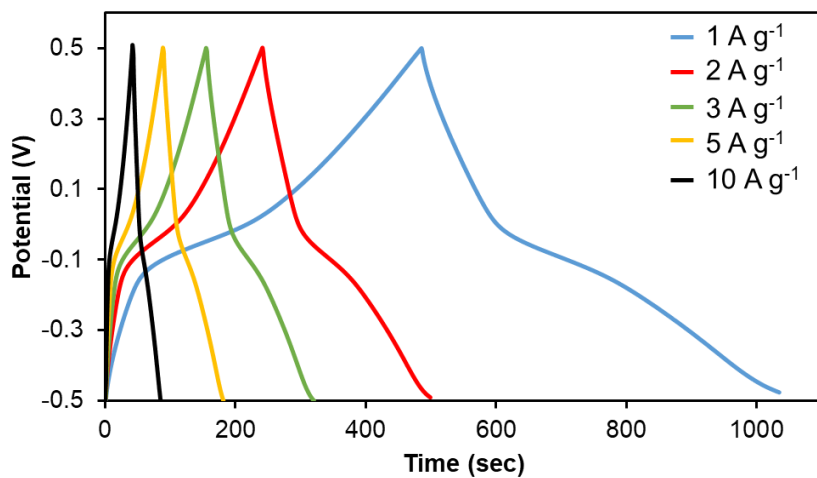

**Fig. S8.** Galvanostatic charge discharge curve of GO 2a at different current density.

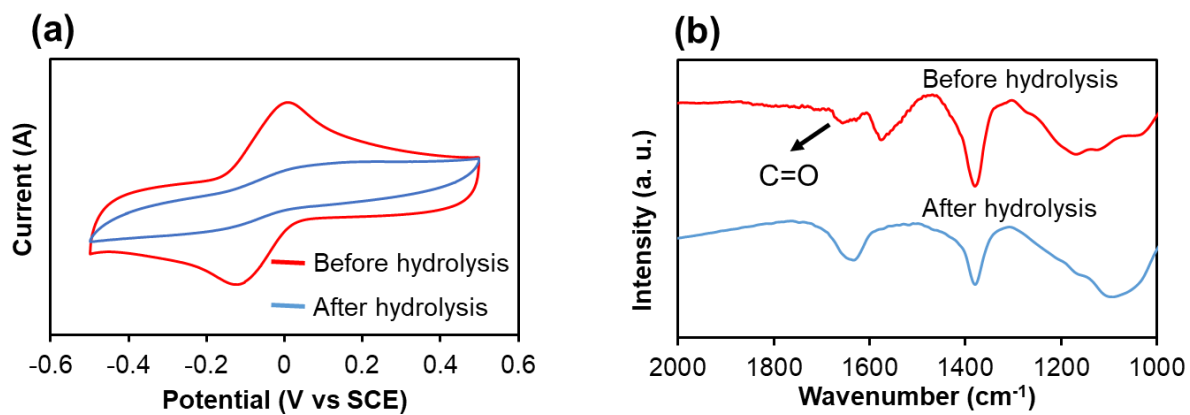

**Fig. S9.** (a) CV study of **GO 2a** before and after hydrolysis of amide bond at a scan rate of 50 mV s<sup>-1</sup>, (b) FTIR analysis of **GO 2a** before and after hydrolysis of amide bond.
